# Supplementary material for: Long-Term Brain Disorders in Post Covid-19 Neurological Syndrome (PCNS) Patient
Source: Brain Sci. 2021 Apr 2;11(4):454. doi: 10.3390/brainsci11040454 (PMC8066611; doi:10.3390/brainsci11040454)
Supplement: Supplementary file 1 [file brainsci-11-00454-s001.xlsx]

## Sheet: Foglio1
	Intensive care
RBC	4.88	106/µl
HGB	11.9	g/dl
HCT	36.9	%
MCV	75.6	fL
MCHC	24.4	pg
MDW-SD	39.8	fL
MDW-CV	15	%
PLT	343	103/µl
MPV	8.6	fL
WBC	4.2	103/µl
NEUT%	71.8	%
LYINPH%	13.7	%
MONO%	14.1	%
EOS%	0.3	%
BASO%	0.1	%
NEUT	3	103/µl
LYMPH	0.6	103/µl
MONO	0.6	103/µl
EOS%	0	103/µl
BASO%	0	103/µl
LYINPH T CD3+	84.3	%
LYINPH T Helper CD3+ CD4+	53.7	%
LYINPH T Suppressor CD3+ CD8+	23.8	%
LYINPH B CD19+	10.2	%
LYINPH NK CD16+ CD56+	4.9	%
LYINPH T CD3+ CD4+ CD8+	0.2	%
Prothrombin activity
	65	%
	1.36	INR
aPTT
aPTT SEC	32	sec.
aPPT Ratio	1.07
Fibrinogen	670	mg/dl
Glycemia	164	mg/dl
C-reactive protein	9.63	mg/dl
